# Supplementary material for: The role of 4-nitrobenzoic acid polymorphs in the crystallization process of organic acid–base multicomponent systems
Source: Royal Society of Chemistry journal article supplement (doi:10.1039/c9ce01239g), 2019-01-01
Supplement: c9ce01239g1.pdf [file c9ce01239g1.pdf]

**Supporting information for:**

**Role of 4-nitrobenzoic acid polymorphs in the crystallization process of the organic acid-base multicomponent system**

Lilia Croitor,<sup>a, b</sup> Mihaela F. Petric,<sup>a</sup> Elisabeta I. Szerb,<sup>a</sup> Gabriela Vlase,<sup>c</sup> Pavlina N. Bourosh,<sup>b</sup> Yurii Chumakov,<sup>b, d</sup> Manuela E. Crisan<sup>\*a</sup>

<sup>a</sup>“Coriolan Dragulescu” Institute of Chemistry, Romanian Academy, Timisoara, Romania;

<sup>b</sup>Institute of Applied Physics, Chisinau, Republic of Moldova;

<sup>c</sup>West University of Timisoara, Research Centre: Thermal Analysis in Environmental Problems, Timisoara, Romania;

<sup>d</sup>Gebze Institute of Technology, Cayirova, Turkey

**Experimental**

Table S1. Crystal data and structure refinement for 4NBH\*

| Compound                                    | 4NBH*                                                       |
|---------------------------------------------|-------------------------------------------------------------|
| Empirical formula                           | C <sub>7</sub> H <sub>5</sub> N <sub>1</sub> O <sub>4</sub> |
| Formula weight                              | 167.12                                                      |
| T                                           | 293(2) K                                                    |
| Wavelength                                  | 0.71073                                                     |
| Crystal system                              | Monoclinic                                                  |
| Space group                                 | C2/c                                                        |
| Z                                           | 8                                                           |
| a(Å)                                        | 21.297(6)                                                   |
| b(Å)                                        | 5.0396(12)                                                  |
| c(Å)                                        | 12.909(3)                                                   |
| β(°)                                        | 96.66(2)                                                    |
| V(Å <sup>3</sup> )                          | 1376.2(6)                                                   |
| Dcalc(mg cm <sup>-3</sup> )                 | 1.613                                                       |
| μ (mm <sup>-1</sup> )                       | 0.136                                                       |
| F(000)                                      | 688                                                         |
| Reflections collected/unique                | 2261                                                        |
| Parameters                                  | 110                                                         |
| GOF on F <sup>2</sup>                       | 0.994                                                       |
| R <sub>1</sub> , wR <sub>2</sub> [I>2σ(I)]  | 0.0643, 0.1140                                              |
| R <sub>1</sub> , wR <sub>2</sub> (all data) | 0.1447, 0.1568                                              |

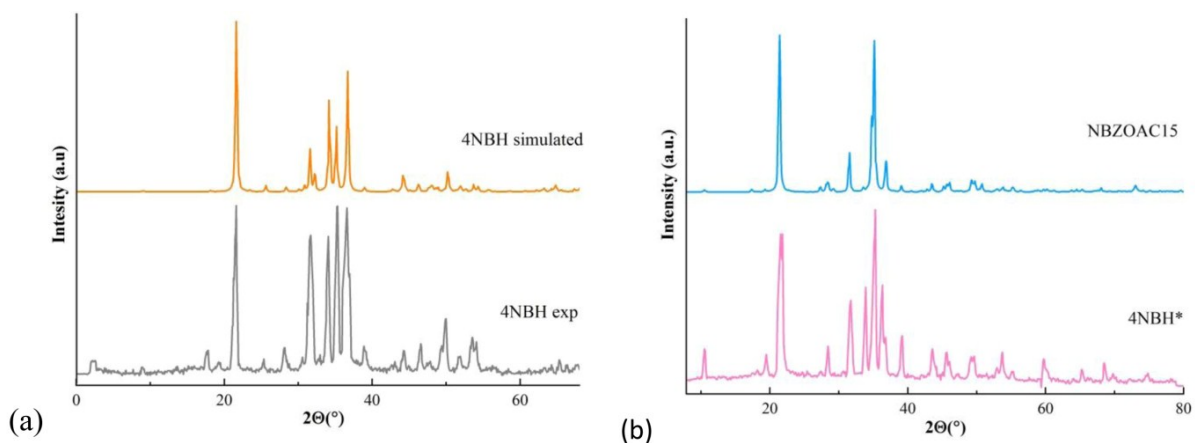

Figure S1. (a) XRPD overlay of experimental and theoretical patterns of 4NBH; (b) XRPD overlay of experimental 4NBH\* and NBZOAC-15 from CSD.

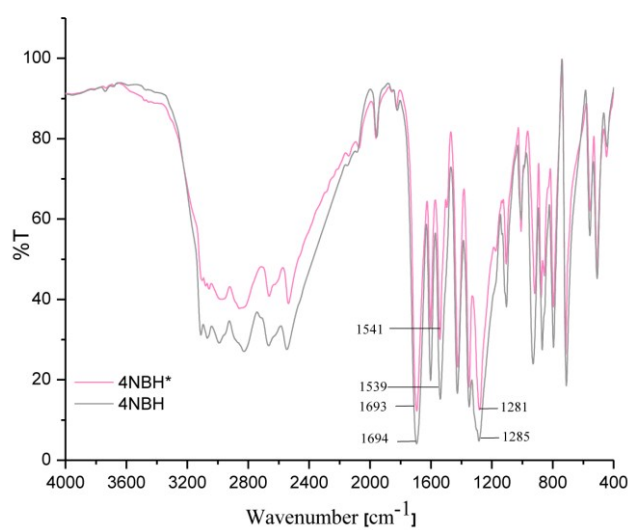

Figure S2. FTIR spectra comparison of 4NBH\* and 4NBH polymorphs

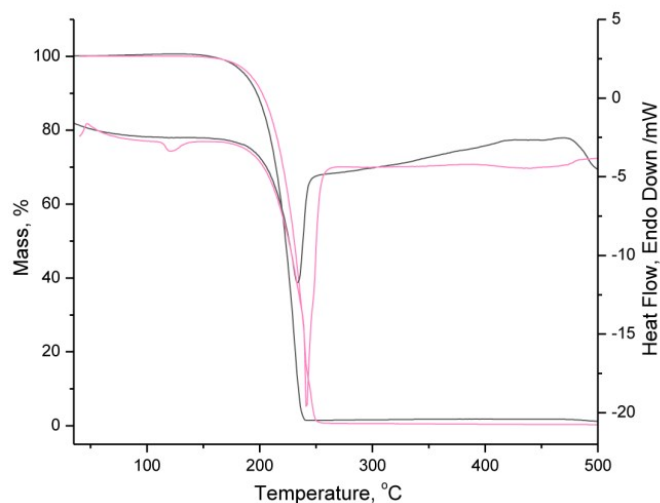

Figure S3. Thermogravimetric curves of 4NBH\* (pink) and 4NBH (grey) polymorphs

## Results and discussion

Table S2. Bond lengths [Å] and angles [°] for DMEA4NB

|                  |            |                 |            |
|------------------|------------|-----------------|------------|
| N(1)-C(4)        | 1.475(3)   | C(1)-C(2)       | 1.517(3)   |
| N(1)-C(1)        | 1.482(3)   | C(5)-C(10)      | 1.385(3)   |
| N(1)-C(3)        | 1.485(3)   | C(5)-C(6)       | 1.391(3)   |
| N(2)-C(8)        | 1.465(2)   | C(5)-C(11)      | 1.505(3)   |
| O(1)-C(2)        | 1.406(3)   | C(6)-C(7)       | 1.377(3)   |
| O(2)-C(11)       | 1.246(2)   | C(7)-C(8)       | 1.378(3)   |
| O(3)-C(11)       | 1.250(2)   | C(8)-C(9)       | 1.382(3)   |
| O(4)-N(2)        | 1.222(2)   | C(9)-C(10)      | 1.379(3)   |
| O(5)-N(2)        | 1.225(2)   |                 |            |
|                  |            |                 |            |
| C(4)-N(1)-C(1)   | 112.90(19) | C(6)-C(5)-C(11) | 120.09(16) |
| C(4)-N(1)-C(3)   | 109.2(2)   | C(7)-C(6)-C(5)  | 121.11(17) |
| C(1)-N(1)-C(3)   | 111.11(18) | C(6)-C(7)-C(8)  | 118.37(17) |
| O(4)-N(2)-O(5)   | 123.02(17) | C(7)-C(8)-C(9)  | 122.22(17) |
| O(4)-N(2)-C(8)   | 118.56(17) | C(7)-C(8)-N(2)  | 118.58(16) |
| O(5)-N(2)-C(8)   | 118.41(16) | C(9)-C(8)-N(2)  | 119.20(17) |
| N(1)-C(1)-C(2)   | 113.12(19) | C(10)-C(9)-C(8) | 118.29(17) |
| O(1)-C(2)-C(1)   | 112.2(2)   | C(9)-C(10)-C(5) | 121.13(17) |
| C(10)-C(5)-C(6)  | 118.87(17) | O(2)-C(11)-O(3) | 124.99(19) |
| C(10)-C(5)-C(11) | 121.02(16) | O(2)-C(11)-C(5) | 117.59(17) |
|                  |            | O(3)-C(11)-C(5) | 117.42(17) |

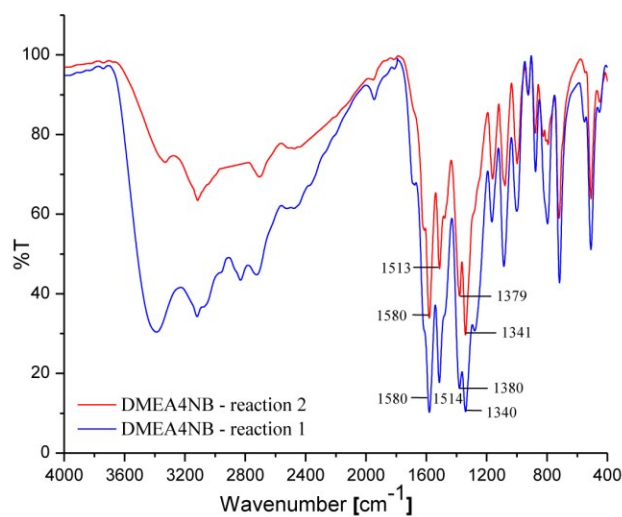

Figure S4. FT-IR spectra of DMEA4NB single crystals (reactions 1 and 2).

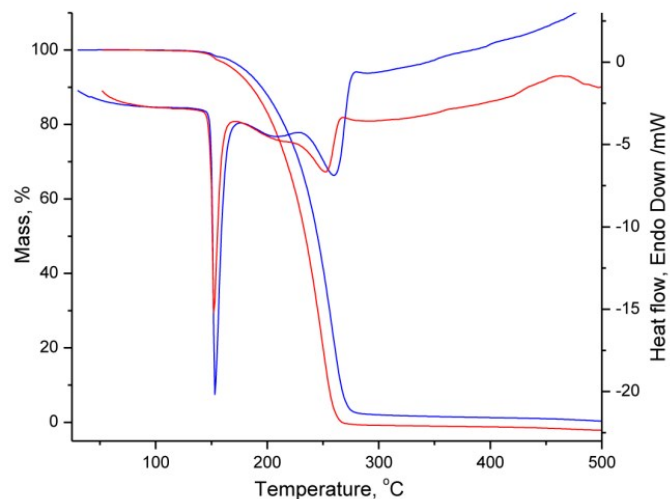

Figure S5. Thermogravimetric curves (TG and heat flow) of DMEA4NB single crystals (reactions 1- blue and reaction 2 - red) at a heating rate of  $10\text{ }^{\circ}\text{C min}^{-1}$ , in the air.

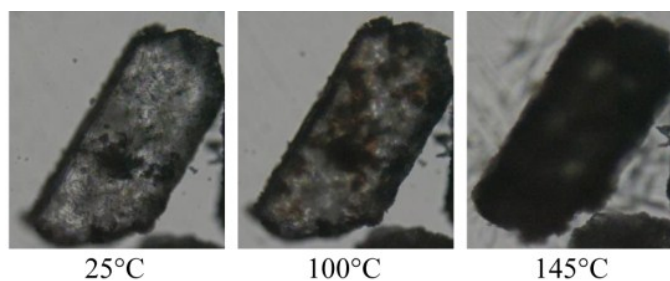

Figure S6. Optical micrographs of DMEA4NB collected at different heating temperatures.
